1 **BIOLOGICAL SCIENCES: Developmental Biology**

2

3 **Polycomb suppresses a female gene regulatory network**  
4 **in Sertoli cells.**

5

6 **So Maezawa<sup>a, b, c, d\*</sup>, Masashi Yukawa<sup>b, e</sup>, Kazuteru Hasegawa<sup>a, b</sup>, Ryo Sugiyama<sup>c</sup>, Mengwen**  
7 **Hu<sup>a, b, f</sup>, Miguel Vidal<sup>g</sup>, Haruhiko Koseki<sup>h</sup>, Artem Barski<sup>b, e</sup>, Tony DeFalco<sup>a, b</sup>, and Satoshi H.**  
8 **Namekawa<sup>a, b, f\*</sup>**

9

10 <sup>a</sup> Division of Reproductive Sciences, Division of Developmental Biology, Perinatal Institute,  
11 Cincinnati Children's Hospital Medical Center, Cincinnati, Ohio, 45229, USA

12 <sup>b</sup> Department of Pediatrics, University of Cincinnati College of Medicine, Cincinnati, Ohio, 45229,  
13 USA

14 <sup>c</sup> Department of Animal Science and Biotechnology, School of Veterinary Medicine, Azabu  
15 University, Sagamihara, Kanagawa 252-5201, Japan

16 <sup>d</sup> Faculty of Science and Technology, Department of Applied Biological Science, Tokyo University  
17 of Science, Chiba 278-8510, Japan.

18 <sup>e</sup> Division of Allergy and Immunology, Division of Human Genetics, Cincinnati Children's  
19 Hospital Medical Center, Cincinnati, Ohio, 45229, USA

20 <sup>f</sup> Department of Microbiology and Molecular Genetics, University of California, Davis,  
21 California, 95616, USA

22 <sup>g</sup> Centro de Investigaciones Biológicas Margarita Salas, Department of Cellular and Molecular  
23 Biology, Madrid 28040, Spain

24 <sup>h</sup> Developmental Genetics Laboratory, RIKEN Center for Allergy and Immunology, Yokohama,  
25 Kanagawa, Japan

26

27 \*Corresponding authors: E-mail: [s-maezawa@rs.tus.ac.jp](mailto:s-maezawa@rs.tus.ac.jp); [snamekawa@ucdavis.edu](mailto:snamekawa@ucdavis.edu)

28

29 Keywords: Polycomb, Sertoli cells, Sex determination, Testis, Spermatogenesis

30 **Abstract**

31

32 **Gonadal sex determination is controlled by the support cells of testes and ovaries. Sexual fate**  
33 **becomes labile and interchangeable with the removal of specific, critical transcription factors**  
34 **from postnatal gonad support cells. In Sertoli cells, the specific support cells for postnatal**  
35 **testes, the epigenetic mechanism that maintains cellular memory to suppress female sexual**  
36 **differentiation remains unknown. Here, we show that, in postnatal Sertoli cells, Polycomb**  
37 **suppresses a female gene regulatory network. Through genetic ablation, we removed**  
38 **Polycomb repressive complex 1 (PRC1) from embryonic Sertoli cells after sex determination.**  
39 **PRC1-depleted postnatal Sertoli cells exhibited defective proliferation and cell death, leading**  
40 **to the degeneration of adult testes. In adult Sertoli cells, PRC1 suppressed the specific, critical**  
41 **genes required for granulosa cells, the support cells of ovaries, thereby inactivating the female**  
42 **gene regulatory network. The underlying chromatin of female genes was coated with**  
43 **Polycomb-mediated repressive modifications: PRC1-mediated H2AK119ub and PRC2-**  
44 **mediated H3K27me3. Taken together, we identify a critical mechanism centered on**  
45 **Polycomb that maintains the male fate in adult testes.**

46

47 **Significance**

48

49 **Sex differences in mammals are defined by the reproductive organs, testes and ovaries. In**  
50 **testes and ovaries, sexual fate is determined by Sertoli cells and granulosa cells, respectively,**  
51 **which are supporting cells derived from common somatic progenitors. Critical transcription**  
52 **factors determine sexual fate of Sertoli and granulosa cells, and, remarkably, removal of these**  
53 **factors reverses sexual identity. Therefore, sexual fate is surprisingly plastic. Here we address**  
54 **a long-standing question in developmental biology of how male sexual fate is maintained in**  
55 **testes throughout life. We show that epigenetic machinery of Polycomb repressive complex 1**  
56 **(PRC1) suppresses a female gene regulatory network in Sertoli cells. Thus, Polycomb**  
57 **preserves cellular memory and sexual identity of Sertoli cells, thereby defining the testicular**  
58 **fate.**

59

## 60 Introduction

61 In mammals, gonadal sex determination takes place in the bipotential somatic cell  
62 precursors of male Sertoli cells and female granulosa cells in embryos (1-3). Sertoli cells are the  
63 first somatic cells to differentiate in the XY gonad. In testes, Sertoli cells function as a regulatory  
64 hub for both differentiation and survival of germ cells, thereby determining male sexual fate (4).  
65 The mechanisms maintaining the male cellular identity of Sertoli cells are fundamental for adult  
66 testicular functions, including spermatogenesis and hormone production.

67

68 At the time of sex determination in embryos, the commitment to the male fate is triggered  
69 by the expression of the Y-linked *Sry* gene, and, subsequently, the female fate is suppressed (1-3).  
70 Distinct gene regulatory networks promote the male or female fate and are regulated by strong  
71 feedback loops that antagonize each other, canalizing one fate from the other (3). Sexual fate is  
72 interchangeable even after the initial commitment to Sertoli cells or granulosa cells with the  
73 removal of specific, critical transcription factors. The loss of *Dmrt1* in Sertoli cells leads to  
74 derepression of *Foxl2*, a master regulator of granulosa cell fate, and transdifferentiation of cell fate  
75 from Sertoli to granulosa cells (5, 6). On the other hand, the loss of *Foxl2* in granulosa cells leads  
76 to derepression of the male gene network and transdifferentiation of cell fate from granulosa to  
77 Sertoli cells (7). These findings, together with follow-up studies (8-12), suggest that active  
78 repression of the alternate sexual fate is important for both testicular and ovarian function, even in  
79 adult life.

80

81 Epigenetic silencing mechanisms serve as molecular switches for the sex determination of  
82 bipotential somatic cell precursors. The deletion of a Polycomb gene *Cbx2* results in male to female  
83 reversal (13), which is mediated through suppression of genes required for the female fate (14).  
84 Additionally, regulation of H3K9 methylation is important for the male sexual fate (15). Although  
85 these studies highlight the importance of epigenetic mechanisms for initial sex determination, the  
86 epigenetic mechanisms by which male cellular identity is maintained through cell divisions and the  
87 proliferation of Sertoli cells remain to be determined.

88

89 Polycomb proteins suppress non-lineage-specific genes and define cellular identities of  
90 each lineage in stem cells and in development (16-18). In this study, we show that Polycomb  
91 suppresses the female gene regulatory network in postnatal Sertoli cells, thereby promoting the  
92 male gene regulatory network to ensure male cell fate. We generated loss-of-function mouse  
93 models of Polycomb repressive complex 1 (PRC1) in Sertoli cells after initial sex determination.

94 We show that PRC1 is required for the proliferation of Sertoli cells, as well as the suppression of  
95 non-lineage-specific genes and the female gene regulatory network in Sertoli cells. Taken together,  
96 we identify a critical mechanism centered on Polycomb that maintains male fate in adult testes.

97

## 98 **Results**

99 **PRC1 in Sertoli cells is required for the maintenance of spermatogenesis.** In postnatal Sertoli  
100 cells (which are detected by the Sertoli cell marker GATA4), RNF2 is highly expressed and the  
101 RNF2-mediated epigenetic mark H2AK119ub is abundant (Fig.1A), which suggests PRC1  
102 functions in these cells. To determine the function of PRC1, we generated a PRC1 loss-of-function  
103 mouse model by removing two redundant catalytic subunits, RNF2 and RING1 (19). We generated  
104 a conditional deletion of *Rnf2* (*Rnf2cKO*) using *Amh-Cre*, which is expressed specifically in Sertoli  
105 cells after embryonic day 14.5 (E14.5) (20), in a background of *Ring1*-knockout (KO) mice (*Amh-*  
106 *Cre*; *Rnf2cKO*; *Ring1*-KO: termed PRC1<sup>*Amh-Cre*</sup>cKO: PRC1AcKO). Although RNF2 appears to be  
107 the most active component in the heterodimeric E3 ligases of PRC1, the RNF2 paralog RING1 can  
108 partially compensate for the loss of RNF2 (19). Therefore, we made a conditional deletion of *Rnf2*  
109 in a background of *Ring1*-KO mice, which are viable and do not have fertility defects (21). This  
110 strategy enabled us to define the function of RNF2 without compensation from RING1, while also  
111 representing a “complete” loss-of-function of PRC1 as shown in testicular germ cells (22) and in  
112 other biological contexts (19, 23, 24). Since PRC1 has various components, including CBX2 (25),  
113 this strategy allows us to determine the global function of PRC1. At the same time, the use of *Amh-*  
114 *Cre* allowed us to test the function of PRC1, specifically after the completion of sex determination  
115 at E12.5.

116

117 PRC1AcKO males have smaller testes compared with littermate controls that harbored  
118 floxed alleles for *Rnf2* on a *Ring1*-KO background without *Amh-Cre* (termed PRC1 control:  
119 PRC1ctrl: Fig. 1B and C). We confirmed efficient *Amh-Cre*-mediated recombination by observing  
120 depletion of the RNF2-mediated mark, H2AK119ub, in GATA4<sup>+</sup> Sertoli cells of PRC1AcKO testes  
121 at E15.5 (> 95 % efficiency: Fig. 1D) and at postnatal day 7 (P7: Fig. 1E). In 6 week-old  
122 PRC1AcKO testes, while the tubules with H2AK119ub<sup>+</sup> Sertoli cells (escaped Cre-mediated  
123 deletion) appear to have normal morphology, we frequently observed disorganization of testicular  
124 tubules that contain H2AK119ub<sup>-</sup> Sertoli cells (underwent Cre-mediated deletion: arrowheads, Fig.  
125 S1), suggesting a critical function of PRC1 in Sertoli cells in the organization of testicular tubules.  
126 This mosaic pattern is presumably due to incomplete Cre-mediated recombination, as the Sertoli  
127 cells that escaped Cre-mediated recombination might have repopulated the testes. Consistent with

128 this interpretation, PRC1AcKO males are subfertile, and 9 out of 15 wild-type females mated with  
129 8-11-week old PRC1AcKO males gave birth (Fig. 1F) at comparable litter sizes (Fig.1G).  
130 Interestingly, fecundity decreased in aged PRC1AcKO males (5 months old), as litter sizes were  
131 smaller as compared to controls (Fig. 1G). To further examine the phenotype, we measured the  
132 blood levels of three hormones critical for testicular homeostasis: although the levels of testosterone  
133 and estradiol were comparable between cKO and control mice, follicle-stimulating hormone was  
134 increased in mutants (Fig. 1H). As follicle stimulating hormone levels are regulated by a feedback  
135 mechanism involving Sertoli cells (26), we infer that the dysfunction of Sertoli cells and testicular  
136 degeneration caused increased follicle stimulating hormone levels to recover Sertoli cell function.

137

138 To determine the cause of testicular degeneration, we next examined the proliferation of  
139 Sertoli cells. In normal mouse development, Sertoli cells proliferate in fetal and neonatal testes  
140 until approximately 2 weeks after birth, and the number of Sertoli cells in adult testes determines  
141 both testis size and daily sperm production (27). In P7 control testes, GATA4<sup>+</sup> Sertoli cells  
142 occasionally co-expressed an S phase marker, PCNA, and another marker of active cell cycle, Ki67  
143 (Fig. 2A), consistent with the active proliferation of Sertoli cells. However, in PRC1AcKO testes,  
144 GATA4<sup>+</sup> Sertoli cells were largely devoid of PCNA and Ki67 (Fig. 2A), suggesting impaired  
145 proliferation of PRC1AcKO Sertoli cells. Next, we independently confirmed the proliferation  
146 phenotype by using EdU labeling of actively proliferating cells. EdU was abdominally  
147 administered to P7 mice, and testicular sections were examined the following day. While GATA4<sup>+</sup>  
148 Sertoli cells were occasionally EdU<sup>+</sup> (approximately one-fourth) in control testes, GATA4<sup>+</sup> Sertoli  
149 cells were devoid of EdU signal in PRC1AcKO testes (Fig. 2B). Additional labeling of H2AK119ub  
150 confirmed the loss of PRC1 function in GATA4<sup>+</sup> Sertoli cells from PRC1AcKO testes (Fig. 2B).  
151 From these results, we conclude that the loss of PRC1 disrupts the proliferation of Sertoli cells.  
152 This is in contrast with PRC1's function in testicular germ cells, in which the loss of PRC1 does  
153 not affect proliferation but instead causes apoptotic cell death (22). This difference suggests a  
154 unique function of PRC1 in Sertoli cells that is distinct from its function in germ cells.

155

156 **In Sertoli cells, PRC1 suppresses genes required for granulosa cells.** We next sought to  
157 determine the genes regulated by PRC1 in Sertoli cells. In PRC1AcKO testes, some Sertoli cells  
158 escaped *Amh*-Cre-mediated recombination. Thus, it was difficult to specifically isolate Sertoli cells  
159 that underwent PRC1 depletion. To precisely determine the function of PRC1 in gene regulation in  
160 Sertoli cells, we used an alternative strategy: we isolated Sertoli cells from a mouse line in which  
161 conditional deletion of PRC1 can be induced by tamoxifen-inducible Cre-mediated recombination

162 under the control of the endogenous ROSA26 promoter (*ROSA26-Cre<sup>ERT</sup>*; *Rnf2<sup>floxexd/floxexd</sup>*; *Ring1-*  
163 *KO*: termed PRC1<sup>ROSA26-CreERT</sup>cKO: PRC1RcKO). After isolating Sertoli cells from P7 testes, we  
164 cultured Sertoli cells for 4 days in the presence of 4-hydroxytamoxifen (4-OHT), and performed  
165 RNA-sequencing (RNA-seq; Fig.3A). As a control, we isolated Sertoli cells from control mice  
166 (*Rnf2<sup>floxexd/floxexd</sup>*; *Ring1-KO*) and cultured them in the same 4-OHT conditions. We performed RNA-  
167 seq for two independent biological replicates and confirmed reproducibility between biological  
168 replicates (Fig. S1A).

169

170 Our RNA-seq analyses demonstrated that 338 genes were upregulated in PRC1RcKO  
171 Sertoli cells as compared to controls, while 307 genes were downregulated in PRC1RcKO Sertoli  
172 cells (Fig. 3A and B). Gene ontology (GO) analysis showed that upregulated genes were enriched  
173 for functions in neural differentiation, skeletal system, and cell adhesion (Fig. 3D). These categories  
174 suggest that PRC1 suppressed expression of non-lineage-specific genes in Sertoli cells. On the  
175 other hand, GO analysis revealed that downregulated genes were enriched for functions in the cell  
176 cycle and M phase (Fig. 3D). This result is in accord with the cell cycle arrest we found in  
177 PRC1AcKO Sertoli cells (Fig. 2).

178

179 Since we anticipated suppression of genes required for granulosa cells by PRC1 in Sertoli  
180 cells, we next investigated the expression level of key genes required for granulosa cells. In  
181 PRC1RcKO Sertoli cells, genes required for female sexual development were upregulated: these  
182 genes included *Rspo1*, an activator of the Wnt pathway (29), and *Foxl2*, a key transcription factor  
183 for granulosa cells (30) (Fig. 3E). Importantly, these female genes suppress the male fate, and the  
184 loss of these genes leads to female-to-male sex reversal (30-32). Consistent with the antagonistic  
185 function of these female genes with the male pathway, key sex determination genes for the male  
186 pathway were downregulated in PRC1RcKO Sertoli cells: these genes included *Sox9*, an  
187 evolutionarily conserved gene for sex determination, which directs the male pathway downstream  
188 of *Sry* (33), and *Dmrt1* (34, 35), male-determining signalling (Fig. 3E).

189

190 To determine whether the suppression of female genes was directly regulated by PRC1, we  
191 performed chromatin immunoprecipitation sequencing (ChIP-seq) of PRC1-mediated H2AK119ub  
192 in isolated wild-type Sertoli cells. We further performed ChIP-seq of H3K27me3 in Sertoli cells  
193 since PRC2-mediated H3K27me3 is regulated by PRC1 and its mediated mark H2A119ub (37, 38).  
194 We performed ChIP-seq for two independent biological replicates and confirmed the  
195 reproducibility between biological replicates (Fig. S1B). We confirmed the enrichment of

196 H2AK119ub and H3K27me3 around transcription start sites (TSSs) of *Rspo1* and *Foxl2* (Fig. 3F).  
197 Compared to the enrichment of H2AK119ub on these female genes, enrichment of H2AK119ub  
198 was relatively low on the TSSs of the male genes, *Sox9* and *Dmrt1*. Therefore, we conclude that  
199 PRC1 directly binds and suppresses *Rspo1* and *Foxl2*.

200

201 Track views of these ChIP-seq data show that all three marks were enriched at *Foxl2* and  
202 *Rspo1* loci (Fig. 4A). Furthermore, enrichment of these three marks was found in other loci such as  
203 *Foxf2*, the mutation of which appears in patients with disorders of sex development (39), and  
204 *Hoxd13*, which is involved in female reproductive tract development (40). These results suggest  
205 that PRC1 works with PRC2 to suppress female genes as well as developmental regulators such as  
206 *Fox* and *Hox* genes, which are the classical targets of Polycomb-mediated gene repression (41).

207

208 To determine the features of genome-wide gene repression mediated by Polycomb  
209 complexes, we analyzed the enrichment of H2AK119ub, H3K27me3, and RNF2 on the upregulated  
210 genes in PRC1RcKO Sertoli cells. H2AK119ub, H3K27me3, and RNF2 were all significantly  
211 enriched on the TSSs of upregulated genes in PRC1RcKO Sertoli cells as compared to all genes in  
212 the genome (Fig. 4B). Additional enrichment analysis confirmed the co-enrichment of H2AK119ub  
213 and H3K27me3 (Fig. 4C, upper panels) as well as co-enrichment of H2AK119ub and RNF2 (Fig.  
214 4C, lower panels) on upregulated genes in PRC1RcKO Sertoli cells. Furthermore, average tag  
215 density analysis confirmed that enrichment of H2AK119ub on upregulated genes in PRC1RcKO  
216 Sertoli cells occurred on upstream regions, gene bodies, and downstream regions with the highest  
217 enrichment near TSSs (Fig. 4D). We found a similar distribution of H3K27me3 around the gene  
218 bodies of upregulated genes in PRC1RcKO Sertoli cells (Fig. S2). Together, these results  
219 confirmed the genome-wide, global functions of PRC1 in the direct regulation of gene repression  
220 in Sertoli cells.

221

### 222 **Polycomb globally inactivates the female gene regulatory network in postnatal Sertoli cells.**

223 Previous studies have suggested that sex determination is canalized by the interconnected,  
224 antagonistic network of genes both in males and in females that are controlled by feedback  
225 mechanisms (3). Since Polycomb is implicated in the maintenance of sex-specific gene regulatory  
226 networks through the PRC2-mediated mark H3K27me3 (14), we hypothesized that PRC1 globally  
227 inactivates the female gene regulatory network in postnatal Sertoli cells. Since male- and female-  
228 specific gene networks are regulated immediately after sex determination during fetal stages (42),  
229 we reasoned that female gene network suppression in fetal Sertoli cells is maintained by PRC1 in



230 postnatal Sertoli cells. To test this hypothesis, we examined the expression profiles of specifically  
231 expressed genes in E13.5 granulosa cells (42) (Fig. S3), termed “pre-granulosa genes” in postnatal  
232 Sertoli cells. We found that pre-granulosa genes were upregulated in PRC1RcKO postnatal Sertoli  
233 cells as compared to other genes (Fig. 5A). On the other hand, specifically expressed genes in E13.5  
234 Sertoli cells (42) (Fig. S3), termed “pre-Sertoli genes,” were downregulated in PRC1RcKO  
235 postnatal Sertoli cells as compared to other genes (Fig. 5A). We further examined the correlation  
236 of each gene and found that pre-granulosa genes were highly correlated with upregulated genes in  
237 PRC1RcKO postnatal Sertoli cells, while pre-Sertoli genes were highly correlated with  
238 downregulated genes in PRC1RcKO postnatal Sertoli cells (Fig. 5B). These results suggest that  
239 PRC1 maintains suppression of the female gene regulatory network, which is initiated at the time  
240 of sex determination and is maintained throughout the development of postnatal Sertoli cells.

241

242 We next sought to determine whether PRC1 directly suppresses the female gene regulatory  
243 network in postnatal Sertoli cells. H2AK119ub is significantly enriched on TSSs of pre-granulosa  
244 genes compared to other genes and pre-Sertoli genes (Fig. 5C). Among pre-granulosa genes,  
245 enrichment of H2AK119ub is positively correlated with upregulated genes in PRC1RcKO  
246 postnatal Sertoli cells (Fig. 5D). We further identified the enrichment of H3K27me3 on TSSs of  
247 pre-granulosa genes in postnatal Sertoli cells (Fig. S4A), and the correlation between H3K27me3  
248 and upregulated genes on the pre-granulosa genes in PRC1RcKO postnatal Sertoli cells (Fig. S4B).  
249 Together, we conclude that PRC1 globally inactivates the female gene regulatory network in  
250 postnatal Sertoli cells.

251

## 252 Discussion

253 In this study, we demonstrated that PRC1 is required for proliferation of Sertoli cells and  
254 suppression of the non-lineage-specific gene expression program and the female gene regulatory  
255 network. Among these functions, we infer that suppression of the female gene regulatory network  
256 is the key mechanism to ensure male fate in addition to canonical functions of PRC1, which controls  
257 proliferation and suppression of non-lineage-specific gene expression programs. Although we did  
258 not observe complete infertility using *Amh*-Cre, presumably due to the repopulation of Sertoli cells  
259 that escaped Cre-mediated recombination, smaller testis size and abnormal tubule organization of  
260 cKO testes (Fig. 1) suggest that PRC1 is critical for physiological functions of Sertoli cells. Below,  
261 we discuss two molecular aspects underlying these physiological phenotypes: control of  
262 proliferation and suppression of the female gene regulatory network.

263

264 The proliferation of Sertoli cells is a critical determinant of testicular functions because the  
265 number of Sertoli cells defines testicular functions (27). Rapid proliferation is a prominent feature  
266 of juvenile Sertoli cells. In general, Polycomb proteins are associated with the cell cycle checkpoint  
267 by directly suppressing the tumor suppressor locus *Cdkn2a/Ink4a/Arf* (43), which functions as a  
268 barrier to cancer transformation (44). Therefore, enhanced Polycomb activity is a frequent feature  
269 of human tumors. We found that *Cdkn2a* was derepressed in PRC1RcKO Sertoli cells  
270 (approximately 2.5-fold upregulation: PRKM value for PRC1RcKO: 32.1 v.s. PRC1ctrl: 13.0).  
271 Therefore, our results suggest that PRC1 promotes the rapid proliferation of Sertoli cells by  
272 suppressing *Cdkn2a*. The function of PRC1 in Sertoli cell proliferation is distinct from Polycomb  
273 functions in testicular germ cells, where PRC1 depletion does not alter the proliferation of germ  
274 cells (22). This may be due to the fact that PRC1 and PRC2 are not required for suppression of  
275 *Cdkn2a* in germ cells (22, 45). The functional difference in testicular germ cells and Sertoli cells  
276 highlights the context-dependent functions of Polycomb proteins. However, a recent study revealed  
277 a novel activity by which PcGs can regulate cell proliferation through DNA replication  
278 independently of *Cdkn2a* (46). Therefore, determining the detailed molecular mechanisms by  
279 which PRC1 controls the proliferation of Sertoli cells will be important for future studies.

280

281 Another critical function of PRC1 in Sertoli cells is the suppression of the female gene  
282 regulatory network. DMRT1 is a critical transcription factor that suppresses the expression of  
283 female genes (5). While more than 10-fold upregulation of the female genes (*Rspo1* and *Foxl2*)  
284 was observed for *Dmrt1* mutants (5), the degree of upregulation of these genes was modest in  
285 PRC1RcKO Sertoli cells (Fig. 3). This finding, combined with genetic evidence, indicates that  
286 DMRT1 could be the direct regulator of suppression of female genes, while PRC1-mediated  
287 mechanisms could be a maintenance mechanism in response to the primary silencing mechanisms  
288 determined by DMRT1. Another possibility is compensation by PRC1-independent suppression  
289 mechanisms. While a portion of PRC2-mediated H3K27me3 is regulated by variant PRC1 (37, 38),  
290 another portion of H3K27me3, mediated by canonical PRC1 and PRC2 complexes, is not  
291 downstream of PRC1 (47). These PRC2-mediated mechanisms or other silencing machinery may  
292 be responsible for the suppression of female genes.

293

294 The notion that Polycomb regulates the female gene regulatory network has been supported  
295 by other recent evidence. In bipotential precursor cells, genes involved in sex determination are  
296 marked with bivalent chromatin domains (14) that are prevalent in pluripotent stem cells and in  
297 germ cells (48-53). Maintenance of the male fate was explained by the persistence of H3K27me3

298 on silent female genes in Sertoli cells (14). Consistent with PRC1's function found in the current  
299 study, Polycomb-mediated silencing may globally suppress the female gene regulatory network.  
300 We found that H2AK119ub was largely associated with this group of female genes (Fig. 5).  
301 Therefore, it would be interesting to speculate that antagonistic male and female networks can be  
302 directly coordinated by Polycomb protein functions, including the strong feedback mechanism  
303 underlying both networks. These possibilities raise several outstanding questions to be addressed  
304 in future studies. What are the functions of another Polycomb complex, PRC2, and of each  
305 Polycomb complex component, including CBX2, in postnatal Sertoli cells? What is the function of  
306 Polycomb in female granulosa cells, especially in the suppression of the male gene regulatory  
307 network? Does Polycomb underlie the feedback regulation of each network to define sexual  
308 identity? Our current study provides a foundation to explore these questions.

309

## 310 **Methods**

311

### 312 **Animals**

313 Generation of mutant *Ring1* and *Rnf2* floxed alleles were previously reported (54). *Amh-Cre*  
314 transgenic mice were purchased from The Jackson Laboratory (Stock No: 007915) (20). *Rosa-Cre*  
315 *ERT* mice were purchased from The Jackson Laboratory (Stock No: 008463) (55). A minimum of  
316 three independent mice were analyzed for each experiment. Institutional Animal Care and Use  
317 Committee approved this work: protocol no. IACUC2018-0040. Fertility tests were performed with  
318 6-weeks old CD1 female mice (purchased from Charles river). At least 2 female mice were bred  
319 with a male mouse for 2 weeks, and the fertility was evaluated by the ratio of pregnant to total  
320 female mice and number of pups.

321

322

### 323 **Ligand test**

324 Blood samples were collected from C57BL/6N mice aged 8–11 weeks. Serum was separated  
325 immediately and stored at -20°C. Hormone assays, including testosterone, estradiol, and follicle  
326 stimulating hormone, were performed by the Center for Research in Reproduction at the University  
327 of Virginia.

328

### 329 **Sertoli cell isolation**

330 Sertoli cells were isolated as previously described with minor modifications (56) and collected from  
331 C57BL/6N mice aged 6–8 days. Testes were collected in a 24-well plate in Dulbecco's Modified

332 Eagle Medium (DMEM) supplemented with GlutaMax (Thermo Fisher Scientific), non-essential  
333 amino acids (NEAA) (Thermo Fisher Scientific), and penicillin and streptomycin (Thermo Fisher  
334 Scientific). After removing the *tunica albuginea* membrane, testes were digested with collagenase  
335 (1 mg/ml) at 34°C for 20 min to remove interstitial cells, then centrifuged at 188×g for 5 min.  
336 Tubules were washed with medium and then digested with trypsin (2.5 mg/ml) at 34°C for 20 min  
337 to obtain a single-cell suspension. To remove KIT-positive spermatogonia, cells were washed with  
338 magnetic cell-sorting (MACS) buffer (PBS supplemented with 0.5% BSA and 5 mM EDTA) and  
339 incubated with CD117 (KIT) MicroBeads (Miltenyi Biotec) on ice for 20 min. Cells were separated  
340 by autoMACS Pro Separator (Miltenyi Biotec) with the program “possel.” Cells in the flow-  
341 through fraction were washed with MACS buffer and incubated with CD90.2 (THY1) MicroBeads  
342 (Miltenyi Biotec) on ice for 20 min to remove THY1-positive spermatogonia. Cells were separated  
343 by autoMACS Pro Separator (Miltenyi Biotec) with the program “posseld.” Cells in the flow-  
344 through fraction were washed and plated in a 6-well plate for 1 h in the medium supplemented with  
345 10% fetal bovine serum, which promotes adhesion of Sertoli cells. Purity was confirmed by  
346 immunostaining.

347 For PRC1RcKO, cells were cultured for 4 days with 1 μM 4-OHT in Dulbecco’s Modified  
348 Eagle Medium (DMEM) supplemented with GlutaMax (Thermo Fisher Scientific), non-essential  
349 amino acids (NEAA) (Thermo Fisher Scientific), and penicillin and streptomycin (Thermo Fisher  
350 Scientific). The same medium was replaced 2 days after the initiation of the culture.

351

### 352 **Histological analysis and germ cell slide preparation**

353 For the preparation of testicular paraffin blocks, testes were fixed with 4% paraformaldehyde (PFA)  
354 overnight at 4°C with gentle inverting. Testes were dehydrated and embedded in paraffin. For  
355 histological analysis, 7 μm-thick paraffin sections were deparaffinized and stained with  
356 hematoxylin and eosin. For immunofluorescence analysis of testicular sections, antigen retrieval  
357 was performed by boiling the slides in target retrieval solution (DAKO) for 10 min and letting the  
358 solution cool for 30 min. Sections were blocked with Blocking One Histo (Nacalai) for 1 h at room  
359 temperature and then incubated with primary antibodies overnight at 4°C. The resulting signals  
360 were detected by incubation with secondary antibodies conjugated to fluorophores (Thermo Fisher  
361 Scientific). Sections were counterstained with DAPI. Images were obtained via a laser scanning  
362 confocal microscope A1R (Nikon) and processed with NIS-Elements (Nikon) and ImageJ  
363 (National Institutes of Health) (57).

364

### 365 **ChIP-sequencing, RNA-sequencing, and data analysis**

366 RNA-seq analyses were performed in the BioWardrobe Experiment Management System (58).  
367 Briefly, reads were aligned by STAR (version STAR\_2.5.3a)75 with default arguments except --  
368 outFilterMultimapNmax 1 and --outFilterMismatchNmax 2. The --outFilterMultimapNmax  
369 parameter was used to allow unique alignments only, and the --outFilterMismatchNmax parameter  
370 was used to allow a maximum of 2 errors. NCBI RefSeq annotation from the mm10 UCSC genome  
371 browser 76 was used, and canonical TSSs (1 TSS per gene) were analyzed. All reads from the  
372 resulting .bam files were split for related isoforms with respect to RefSeq annotation. Then, the EM  
373 algorithm was used to estimate the number of reads for each isoform. To detect differentially  
374 expressed genes between two biological samples, a read count output file was input to the DESeq2  
375 package (version 1.16.1); then, the program functions DESeqDataSetFromMatrix and DESeq were  
376 used to compare each gene's expression level between two biological samples. Differentially  
377 expressed genes were identified through binominal tests, thresholding Benjamini-Hochberg-  
378 adjusted P values to <0.01. To perform gene ontology analyses, the functional annotation clustering  
379 tool in DAVID (version 6.8) was used, and a background of all mouse genes was applied.  
380 Biological process term groups with a significance of  $P < 0.05$  (modified Fisher's exact test) were  
381 considered significant.

382 Cross-linking ChIP-seq with the ChIPmetation method (59) was performed for  
383 H2AK119ub, H3K27me3, and RNF2 as described previously (59). Data analysis for both ChIP-  
384 seq and RNA-seq was performed in the BioWardrobe Experiment Management System  
385 (<https://github.com/Barski-lab/biowardrobe> (58)). Briefly, reads were aligned to the mouse genome  
386 (mm10) with Bowtie (version 1.0.0 (60)), assigned to RefSeq genes (which have one annotation  
387 per gene) using the BioWardrobe algorithm, and displayed on a local mirror of the UCSC genome  
388 browser as coverage. Peaks of H2AK119ub-, H3K27me3- and RNF2-enrichment were identified  
389 using MACS2 (version 2.0.10.20130712 (61)). Pearson correlations for the genome-wide  
390 enrichment of the peaks among ChIP-seq library replicates were analyzed using SeqMonk  
391 (Babraham Institute). Average tag density profiles were calculated around gene bodies, including  
392 5-kb upstream and 5-kb downstream of the genes. Resulting graphs were smoothed in 200-bp  
393 windows. Enrichment levels for ChIP-seq experiments were calculated for 4-kb windows, promoter  
394 regions of genes ( $\pm 2$  kb surrounding TSSs), and enhancer regions. To normalize tag value read  
395 counts were multiplied by 1,000,000 and then divided by the total number of reads in each  
396 nucleotide position. The total amount of tag values in promoter or enhancer regions were calculated  
397 as enrichment. Microarray data was analyzed using the processed data (42). Differentially  
398 expressed genes were identified through a p-value cutoff of 0.05, and a fold change cutoff of 2 for  
399 the comparison between E13.5 XX supporting cells and E13.5 XY supporting cells. Highly

400 expressed genes in E13.5 XY supporting cells and in E13.5 XX supporting cells were termed as  
401 “Pre-sertoli genes” and “Pre-granulosa genes”, respectively. RNA-seq and ChIP-seq data reported  
402 in this paper will be deposited to GEO.

403

#### 404 **Acknowledgments**

405 We thank David Zarkower and Vivian Bardwell for their help and discussion in the initial phase of  
406 this project, Katie Gerhardt for editing the manuscript, and the members of the Namekawa and  
407 Maezawa laboratories for discussion and helpful comments regarding the manuscript. This work  
408 was supported by Grant-in-Aid for Research Activity Start-up (19K21196), the Takeda Science  
409 Foundation (2019), and the Uehara Memorial Foundation Research Incentive Grant (2018) to SM,  
410 NIH Grants GM119134 to AB, and GM098605 and GM122776 to SHN.

411

#### 412 **Figure legends**

##### 413 **Figure 1. Deletion of PRC1 in Sertoli cells.**

414 (A) RNF2 and RNF2-mediated H2AK119ub localized at GATA4-positive Sertoli cells (yellow  
415 arrows) in a testicular section at 6 weeks of age. Regions bordered by yellow squares are magnified  
416 in the right panels. Bars in the large panels: 50  $\mu$ m. Bars in the magnified panels: 20  $\mu$ m. (B)  
417 Genotypes and photographs of testes at 6 weeks of age. Measurement scale in the panel: 2 cm. (C)  
418 Testicular weight/body weight ratio ( $\times 10^{-3}$ ) at 12 weeks of age.  $P < 0.0001$ , unpaired t-test. (D, E)  
419 Localization of H2AK119ub and GATA4 in PRC1ctrl and PRC1AcKO at embryonic day 15.5 (D)  
420 and 1 week of age (E). Regions bordered by yellow squares are magnified in the right panels. Bars  
421 in the large panels: 50  $\mu$ m. Bars in the magnified panels: 20  $\mu$ m. H2AK119ub<sup>+</sup> Sertoli cells in  
422 mutants are shown with white arrows. (F) The fertility of PRC1AcKO males, at 8-11 weeks of age  
423 and 5 months of age, were tested via crosses with CD1 wild-type females. Numbers of males tested  
424 are shown within the bars, and numbers of females with pups and all females are shown above the  
425 bars.  $*P < 0.05$ , Fisher’s exact test. (G) Litter sizes of breeding tests at 8-11 weeks of age and 5  
426 months of age.  $*P < 0.05$ , Welch’s t-test. (H) Ligand hormone tests at 8-11 weeks of age testes.  $*P$   
427  $< 0.05$ , Welch’s t-test. n.s., not significant.

428

##### 429 **Figure 2. PRC1 is required for proliferation of Sertoli cells.**

430 (A) PCNA and Ki67 were not detected in GATA4-positive Sertoli cells (arrows) in a PRC1AcKO  
431 testicular section at 6 weeks of age, while PCNA and Ki67 were present in PRC1ctrl Sertoli cells.  
432 (B) Testicular sections of the indicated genotypes 1 day following the injection of EdU into males  
433 at 1 week of age. The presence of EdU-positive Sertoli cells (arrows) was decreased in PRC1AcKO

434 testes. Regions bordered by yellow squares are magnified in the right panels. Bars in the large  
435 panels: 50  $\mu$ m. Bars in the magnified panels: 20  $\mu$ m.

436

437 **Figure 3. In Sertoli cells, PRC1 suppresses genes required for granulosa cells.**

438 (A) Genotypes and experiment schematic. Sertoli cells were isolated from P7 testes and cultured  
439 for 4 days in the presence of 4-OHT prior to RNA-seq analyses. (B) The numbers of differentially  
440 expressed genes detected by RNA-seq ( $\geq 1.5$ -fold change) in Sertoli cells (2 biological replicates)  
441 between PRC1ctrl and PRC1RcKO. (C) Heatmaps showing gene expression patterns for  
442 upregulated (left) and down-regulated (right) genes in Sertoli cells. (D) GO term analyses. (E)  
443 Expression levels for representative Sertoli and granulosa genes. (F, G) H2AK119ub and  
444 H3K27me3 ChIP-seq enrichment around the TSSs of representative Sertoli and granulosa genes.

445

446 **Figure 4. In Sertoli cells, Polycomb-mediated marks are enriched on genes required for**  
447 **granulosa cells.**

448 (A) Genome track views of representative genes in the female gene regulatory network. ChIP-seq  
449 enrichment in wild-type Sertoli cells is shown (top); RNA-seq peaks in PRC1ctrl and PRC1RcKO  
450 Sertoli cells are shown (bottom). (B) Box-and-whisker plots showing distributions of enrichment  
451 for ChIP-seq data. Central bars represent medians, the boxes encompass 50% of the data points,  
452 and the whiskers indicate 90% of the data points. *P*, Mann-Whitney U tests. (C) Scatter plots  
453 showing ChIP-seq enrichment ( $\pm 2$  kb around TSSs) of indicated modifications on genes  
454 upregulated (left panels) and down-regulated (right panels) in Sertoli cells. The distribution of all  
455 genes is shown with gray dots. (D) Average tag densities of H2AK119ub ChIP-seq enrichment.

456

457 **Figure 5. Polycomb inactivates the female gene regulatory network in Sertoli cells.**

458 (A) Box-and-whisker plots showing distributions of RNA-seq data. Central bars represent medians,  
459 the boxes encompass 50% of the data points, and the whiskers indicate 90% of the data points. \*\*\*  
460 *P* < 0.0001, Mann-Whitney U tests. (B) Scatter plots showing the Pearson correlation between  
461 RNA-seq data for genes regulated in E13.5 support cells and P7 Sertoli cells. A linear trendline is  
462 shown in blue. (C) Box-and-whisker plots showing distributions of enrichment for H2AK119ub  
463 ChIP-seq data. Central bars represent medians, the boxes encompass 50% of the data points, and  
464 the whiskers indicate 90% of the data points. \*\*\* *P* < 0.0001, \*\* *P* < 0.005, Mann-Whitney U tests.  
465 (D) Scatter plots showing the Pearson correlation between ChIP-seq enrichment ( $\pm 2$  kb around  
466 TSSs) and gene expression in Sertoli cells. A linear trendline is shown in blue.

467

468 **Figure S1. Deletion of PRC1 in Sertoli cells causes degeneration of testes at 6 weeks of age.**

469 Localization of H2AK119ub and GATA4 in PRC1ctrl and PRC1AcKO at 6 weeks of age. Regions  
470 bordered by yellow squares are magnified in the right panels. Bars in the large panels: 50  $\mu$ m. Bars  
471 in the magnified panels: 20  $\mu$ m. H2AK119ub<sup>+</sup> Sertoli cells in mutants are shown with white arrows.

472

473 **Figure S1. Biological replicates for RNA-seq and ChIP-seq data.**

474 (A) Scatter plots show the reproducibility of RNA-seq enrichment at individual peaks between  
475 biological replicates. (B) Scatter plots show the reproducibility of and ChIP-seq enrichment at  
476 individual peaks between biological replicates. Each peak was identified using MACS ( $P < 1 \times 10^{-5}$ ).  
477 H3K27ac ChIP-seq enrichment levels are shown in log<sub>2</sub> RPKM values. The color scale indicates  
478 RNA-seq or ChIP-seq peak density. Pearson correlation values (R) are shown.

479

480 **Figure S2. In Sertoli cells, H3K27me3 is enriched on genes required for granulosa cells.**

481 Average tag densities of H3K27me3 ChIP-seq enrichment on the groups of genes indicated in the  
482 panel.

483

484 **Figure S3. Expression profiles of specifically expressed genes in E13.5 granulosa cells.**

485 Microarray analysis of gene expression in E13.5 supporting cells (42). Genes with the criteria of 2-  
486 fold higher expression in E13.5 XX supporting cells and  $P < 0.05$  were termed as “Pre-granulosa  
487 genes” and shown in green. Genes with the criteria of 2-fold higher expression in E13.5 XY  
488 supporting cells and  $P < 0.05$  were termed as “Pre-sertoli genes” and shown in red.

489

490 **Figure S4. H3K27me3 is involved in the female gene regulatory network in Sertoli cells. (A)**

491 Box-and-whisker plots showing distributions of enrichment for H3K27me3 ChIP-seq data. Central  
492 bars represent medians, the boxes encompass 50% of the data points, and the whiskers indicate  
493 90% of the data points. \*\*\*  $P < 0.0001$ , Mann-Whitney U tests. (B) Scatter plots showing the  
494 Pearson correlation between ChIP-seq enrichment ( $\pm 2$  kb around TSSs) and gene expression in  
495 Sertoli cells. A linear trendline is shown in blue.

496

497

498



499 **References**

- 500 1. A. Swain, R. Lovell-Badge, Mammalian sex determination: a molecular drama. *Genes Dev*  
501 **13**, 755-767 (1999).
- 502 2. D. Wilhelm, S. Palmer, P. Koopman, Sex determination and gonadal development in  
503 mammals. *Physiol Rev* **87**, 1-28 (2007).
- 504 3. B. Capel, Vertebrate sex determination: evolutionary plasticity of a fundamental switch.  
505 *Nature reviews. Genetics* **18**, 675-689 (2017).
- 506 4. T. Svingen, P. Koopman, Building the mammalian testis: origins, differentiation, and  
507 assembly of the component cell populations. *Genes Dev* **27**, 2409-2426 (2013).
- 508 5. C. K. Matson *et al.*, DMRT1 prevents female reprogramming in the postnatal mammalian  
509 testis. *Nature* **476**, 101-104 (2011).
- 510 6. C. K. Matson, D. Zarkower, Sex and the singular DM domain: insights into sexual  
511 regulation, evolution and plasticity. *Nat Rev Genet* **13**, 163-174 (2012).
- 512 7. N. H. Uhlentaut *et al.*, Somatic sex reprogramming of adult ovaries to testes by FOXL2  
513 ablation. *Cell* **139**, 1130-1142 (2009).
- 514 8. A. Minkina *et al.*, DMRT1 protects male gonadal cells from retinoid-dependent sexual  
515 transdifferentiation. *Dev Cell* **29**, 511-520 (2014).
- 516 9. R. E. Lindeman *et al.*, Sexual cell-fate reprogramming in the ovary by DMRT1. *Curr Biol*  
517 **25**, 764-771 (2015).
- 518 10. L. Zhao, T. Svingen, E. T. Ng, P. Koopman, Female-to-male sex reversal in mice caused  
519 by transgenic overexpression of Dmrt1. *Development (Cambridge, England)* **142**, 1083-  
520 1088 (2015).
- 521 11. Y. Li *et al.*, beta-Catenin directs the transformation of testis Sertoli cells to ovarian  
522 granulosa-like cells by inducing Foxl2 expression. *The Journal of biological chemistry*  
523 **292**, 17577-17586 (2017).

- 524 12. B. Nicol *et al.*, Genome-wide identification of FOXL2 binding and characterization of  
525 FOXL2 feminizing action in the fetal gonads. *Hum Mol Genet* **27**, 4273-4287 (2018).
- 526 13. Y. Katoh-Fukui *et al.*, Male-to-female sex reversal in M33 mutant mice. *Nature* **393**, 688-  
527 692 (1998).
- 528 14. S. A. Garcia-Moreno *et al.*, CBX2 is required to stabilize the testis pathway by repressing  
529 Wnt signaling. *PLoS genetics* **15**, e1007895 (2019).
- 530 15. S. Kuroki *et al.*, Epigenetic regulation of mouse sex determination by the histone  
531 demethylase Jmjd1a. *Science* **341**, 1106-1109 (2013).
- 532 16. L. Ringrose, R. Paro, Polycomb/Trithorax response elements and epigenetic memory of  
533 cell identity. *Development (Cambridge, England)* **134**, 223-232 (2007).
- 534 17. L. Aloia, B. Di Stefano, L. Di Croce, Polycomb complexes in stem cells and embryonic  
535 development. *Development (Cambridge, England)* **140**, 2525-2534 (2013).
- 536 18. J. A. Simon, R. E. Kingston, Occupying chromatin: Polycomb mechanisms for getting to  
537 genomic targets, stopping transcriptional traffic, and staying put. *Molecular cell* **49**, 808-  
538 824 (2013).
- 539 19. M. Endoh *et al.*, Histone H2A mono-ubiquitination is a crucial step to mediate PRC1-  
540 dependent repression of developmental genes to maintain ES cell identity. *PLoS genetics*  
541 **8**, e1002774 (2012).
- 542 20. R. W. Holdcraft, R. E. Braun, Androgen receptor function is required in Sertoli cells for  
543 the terminal differentiation of haploid spermatids. *Development (Cambridge, England)*  
544 **131**, 459-467 (2004).
- 545 21. M. del Mar Lorente *et al.*, Loss- and gain-of-function mutations show a polycomb group  
546 function for Ring1A in mice. *Development (Cambridge, England)* **127**, 5093-5100 (2000).
- 547 22. S. Maezawa *et al.*, Polycomb directs timely activation of germline genes in  
548 spermatogenesis. *Genes & development* **31**, 1693-1703 (2017).

- 549 23. S. Yokobayashi *et al.*, PRC1 coordinates timing of sexual differentiation of female  
550 primordial germ cells. *Nature* **495**, 236-240 (2013).
- 551 24. E. Posfai *et al.*, Polycomb function during oogenesis is required for mouse embryonic  
552 development. *Genes & development* **26**, 920-932 (2012).
- 553 25. Z. Gao *et al.*, PCGF homologs, CBX proteins, and RYBP define functionally distinct PRC1  
554 family complexes. *Molecular cell* **45**, 344-356 (2012).
- 555 26. O. O. Oduwole, H. Peltoketo, I. T. Huhtaniemi, Role of Follicle-Stimulating Hormone in  
556 Spermatogenesis. *Front Endocrinol (Lausanne)* **9**, 763 (2018).
- 557 27. R. M. Sharpe, C. McKinnell, C. Kivlin, J. S. Fisher, Proliferation and functional maturation  
558 of Sertoli cells, and their relevance to disorders of testis function in adulthood.  
559 *Reproduction (Cambridge, England)* **125**, 769-784 (2003).
- 560 28. S. Vainio, M. Heikkila, A. Kispert, N. Chin, A. P. McMahon, Female development in  
561 mammals is regulated by Wnt-4 signalling. *Nature* **397**, 405-409 (1999).
- 562 29. A. A. Chassot *et al.*, Activation of beta-catenin signaling by Rspo1 controls differentiation  
563 of the mammalian ovary. *Hum Mol Genet* **17**, 1264-1277 (2008).
- 564 30. D. Schmidt *et al.*, The murine winged-helix transcription factor Foxl2 is required for  
565 granulosa cell differentiation and ovary maintenance. *Development (Cambridge, England)*  
566 **131**, 933-942 (2004).
- 567 31. P. Parma *et al.*, R-spondin1 is essential in sex determination, skin differentiation and  
568 malignancy. *Nature genetics* **38**, 1304-1309 (2006).
- 569 32. C. Ottolenghi *et al.*, Loss of Wnt4 and Foxl2 leads to female-to-male sex reversal extending  
570 to germ cells. *Human molecular genetics* **16**, 2795-2804 (2007).
- 571 33. V. P. Vidal, M. C. Chaboissier, D. G. de Rooij, A. Schedl, Sox9 induces testis development  
572 in XX transgenic mice. *Nature genetics* **28**, 216-217 (2001).
- 573 34. C. S. Raymond *et al.*, Evidence for evolutionary conservation of sex-determining genes.  
574 *Nature* **391**, 691-695 (1998).

- 575 35. C. S. Raymond, M. W. Murphy, M. G. O'Sullivan, V. J. Bardwell, D. Zarkower, Dmrt1, a  
576 gene related to worm and fly sexual regulators, is required for mammalian testis  
577 differentiation. *Genes & development* **14**, 2587-2595 (2000).
- 578 36. H. H. Yao, W. Whoriskey, B. Capel, Desert Hedgehog/Patched 1 signaling specifies fetal  
579 Leydig cell fate in testis organogenesis. *Genes & development* **16**, 1433-1440 (2002).
- 580 37. N. P. Blackledge *et al.*, Variant PRC1 complex-dependent H2A ubiquitylation drives PRC2  
581 recruitment and polycomb domain formation. *Cell* **157**, 1445-1459 (2014).
- 582 38. S. Cooper *et al.*, Targeting polycomb to pericentric heterochromatin in embryonic stem  
583 cells reveals a role for H2AK119u1 in PRC2 recruitment. *Cell reports* **7**, 1456-1470 (2014).
- 584 39. U. Jochumsen *et al.*, Mutation analysis of FOXF2 in patients with disorders of sex  
585 development (DSD) in combination with cleft palate. *Sex Dev* **2**, 302-308 (2008).
- 586 40. H. Du, H. S. Taylor, The Role of Hox Genes in Female Reproductive Tract Development,  
587 Adult Function, and Fertility. *Cold Spring Harb Perspect Med* **6**, a023002 (2015).
- 588 41. T. I. Lee *et al.*, Control of developmental regulators by Polycomb in human embryonic  
589 stem cells. *Cell* **125**, 301-313 (2006).
- 590 42. S. A. Jameson *et al.*, Temporal transcriptional profiling of somatic and germ cells reveals  
591 biased lineage priming of sexual fate in the fetal mouse gonad. *PLoS genetics* **8**, e1002575  
592 (2012).
- 593 43. J. J. Jacobs, K. Kieboom, S. Marino, R. A. DePinho, M. van Lohuizen, The oncogene and  
594 Polycomb-group gene bmi-1 regulates cell proliferation and senescence through the ink4a  
595 locus. *Nature* **397**, 164-168 (1999).
- 596 44. M. Serrano *et al.*, Role of the INK4a locus in tumor suppression and cell mortality. *Cell*  
597 **85**, 27-37 (1996).
- 598 45. W. Mu, J. Starmer, A. M. Fedoriw, D. Yee, T. Magnuson, Repression of the soma-specific  
599 transcriptome by Polycomb-repressive complex 2 promotes male germ cell development.  
600 *Genes & development* **28**, 2056-2069 (2014).

- 601 46. A. Piunti *et al.*, Polycomb proteins control proliferation and transformation independently  
602 of cell cycle checkpoints by regulating DNA replication. *Nature communications* **5**, 3649  
603 (2014).
- 604 47. A. Laugesen, J. W. Hojfeldt, K. Helin, Molecular Mechanisms Directing PRC2  
605 Recruitment and H3K27 Methylation. *Mol Cell* **74**, 8-18 (2019).
- 606 48. B. E. Bernstein *et al.*, A bivalent chromatin structure marks key developmental genes in  
607 embryonic stem cells. *Cell* **125**, 315-326 (2006).
- 608 49. S. S. Hammoud *et al.*, Distinctive chromatin in human sperm packages genes for embryo  
609 development. *Nature* **460**, 473-478 (2009).
- 610 50. B. J. Lesch, G. A. Dokshin, R. A. Young, J. R. McCarrey, D. C. Page, A set of genes critical  
611 to development is epigenetically poised in mouse germ cells from fetal stages through  
612 completion of meiosis. *Proceedings of the National Academy of Sciences of the United*  
613 *States of America* **110**, 16061-16066 (2013).
- 614 51. H. S. Sin, A. V. Kartashov, K. Hasegawa, A. Barski, S. H. Namekawa, Poised chromatin  
615 and bivalent domains facilitate the mitosis-to-meiosis transition in the male germline. *BMC*  
616 *biology* **13**, 53 (2015).
- 617 52. S. Maezawa *et al.*, Polycomb protein SCML2 facilitates H3K27me3 to establish bivalent  
618 domains in the male germline. *Proceedings of the National Academy of Sciences of the*  
619 *United States of America* **115**, 4957-4962 (2018).
- 620 53. S. Maezawa, M. Yukawa, K. G. Alavattam, A. Barski, S. H. Namekawa, Dynamic  
621 reorganization of open chromatin underlies diverse transcriptomes during spermatogenesis.  
622 *Nucleic Acids Res* **46**, 593-608 (2018).
- 623 54. C. Cales *et al.*, Inactivation of the polycomb group protein Ring1B unveils an  
624 antiproliferative role in hematopoietic cell expansion and cooperation with tumorigenesis  
625 associated with Ink4a deletion. *Mol Cell Biol* **28**, 1018-1028 (2008).

- 626 55. A. Ventura *et al.*, Restoration of p53 function leads to tumour regression in vivo. *Nature*  
627 **445**, 661-665 (2007).
- 628 56. Y. F. Chang, J. S. Lee-Chang, S. Panneerdoss, J. A. MacLean, 2nd, M. K. Rao, Isolation of  
629 Sertoli, Leydig, and spermatogenic cells from the mouse testis. *Biotechniques* **51**, 341-342,  
630 344 (2011).
- 631 57. C. A. Schneider, W. S. Rasband, K. W. Eliceiri, NIH Image to ImageJ: 25 years of image  
632 analysis. *Nat Methods* **9**, 671-675 (2012).
- 633 58. A. V. Kartashov, A. Barski, BioWardrobe: an integrated platform for analysis of  
634 epigenomics and transcriptomics data. *Genome biology* **16**, 158 (2015).
- 635 59. C. Schmidl, A. F. Rendeiro, N. C. Sheffield, C. Bock, ChIPmentation: fast, robust, low-  
636 input ChIP-seq for histones and transcription factors. *Nat Methods* **12**, 963-965 (2015).
- 637 60. B. Langmead, C. Trapnell, M. Pop, S. L. Salzberg, Ultrafast and memory-efficient  
638 alignment of short DNA sequences to the human genome. *Genome biology* **10**, R25 (2009).
- 639 61. Y. Zhang *et al.*, Model-based analysis of ChIP-Seq (MACS). *Genome biology* **9**, R137  
640 (2008).
- 641

Maezawa\_Fig1

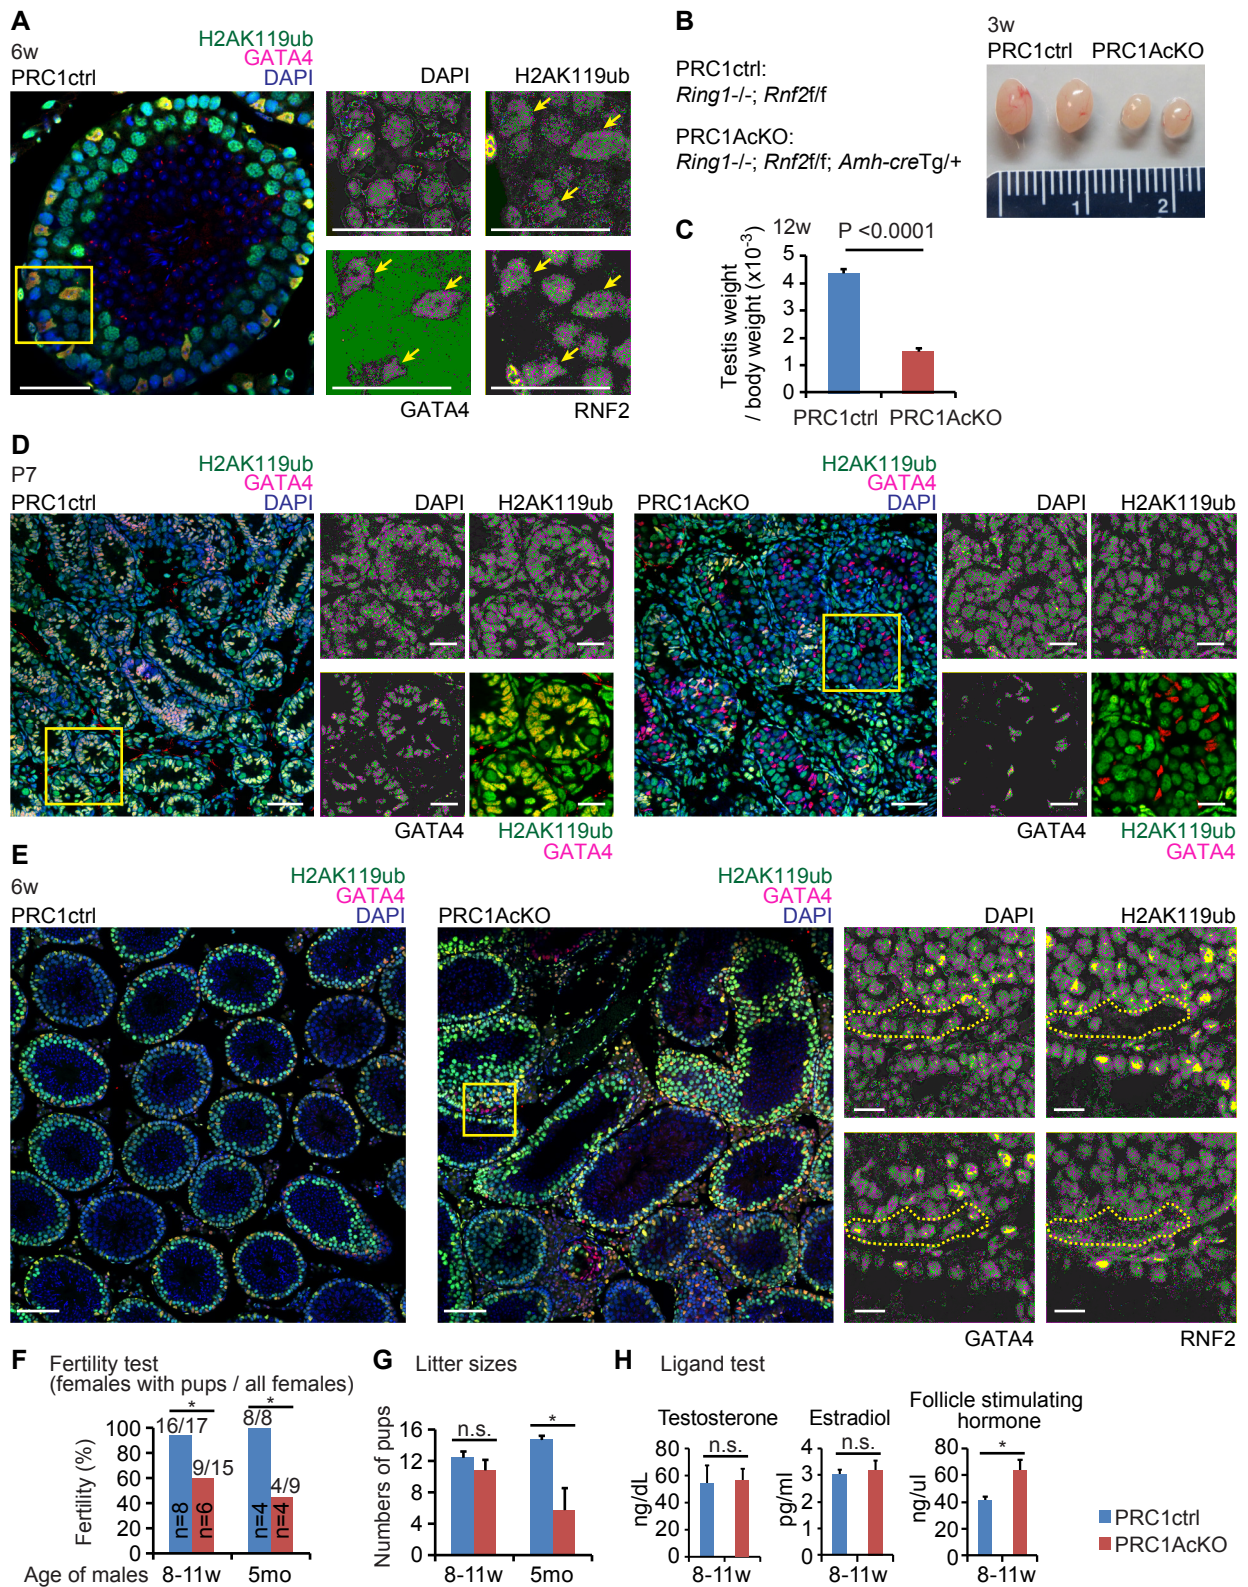

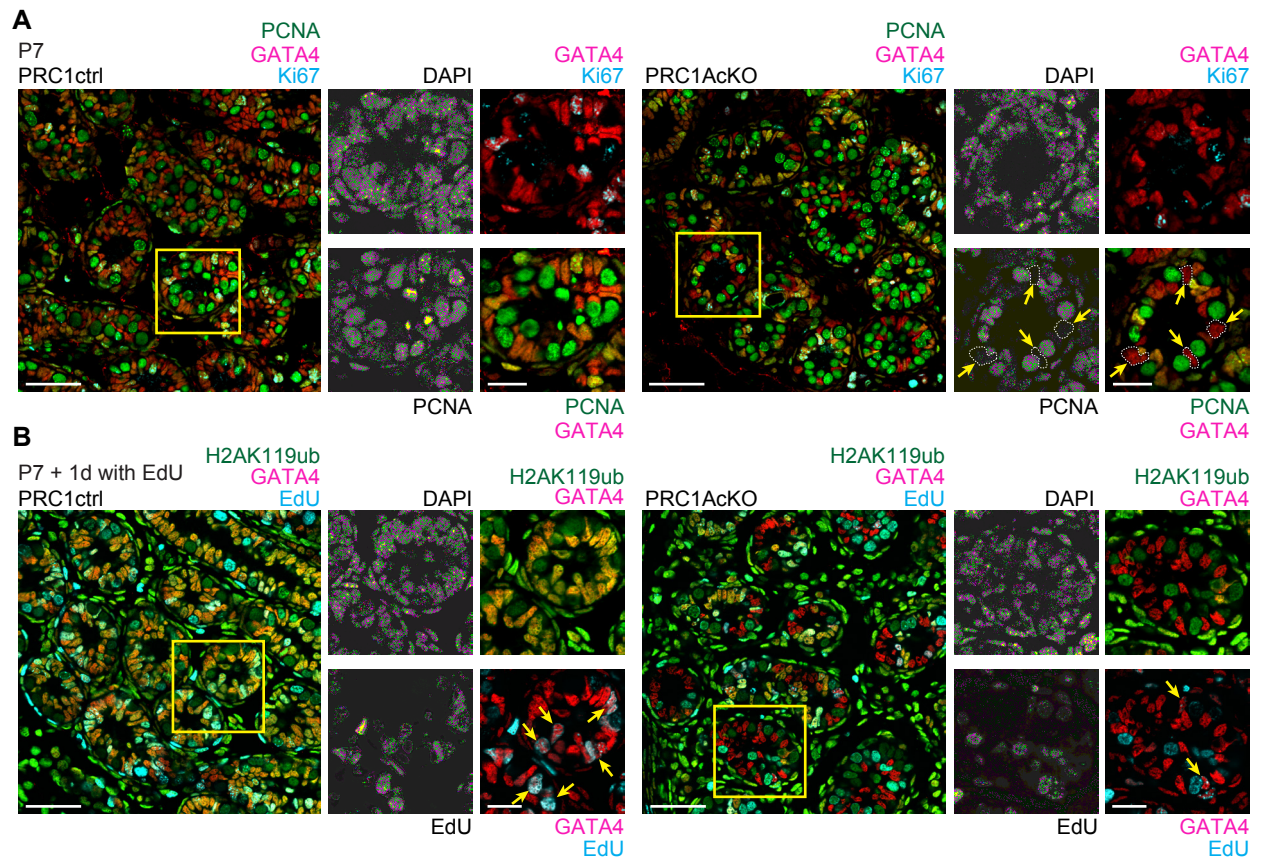



## Maezawa\_Fig3

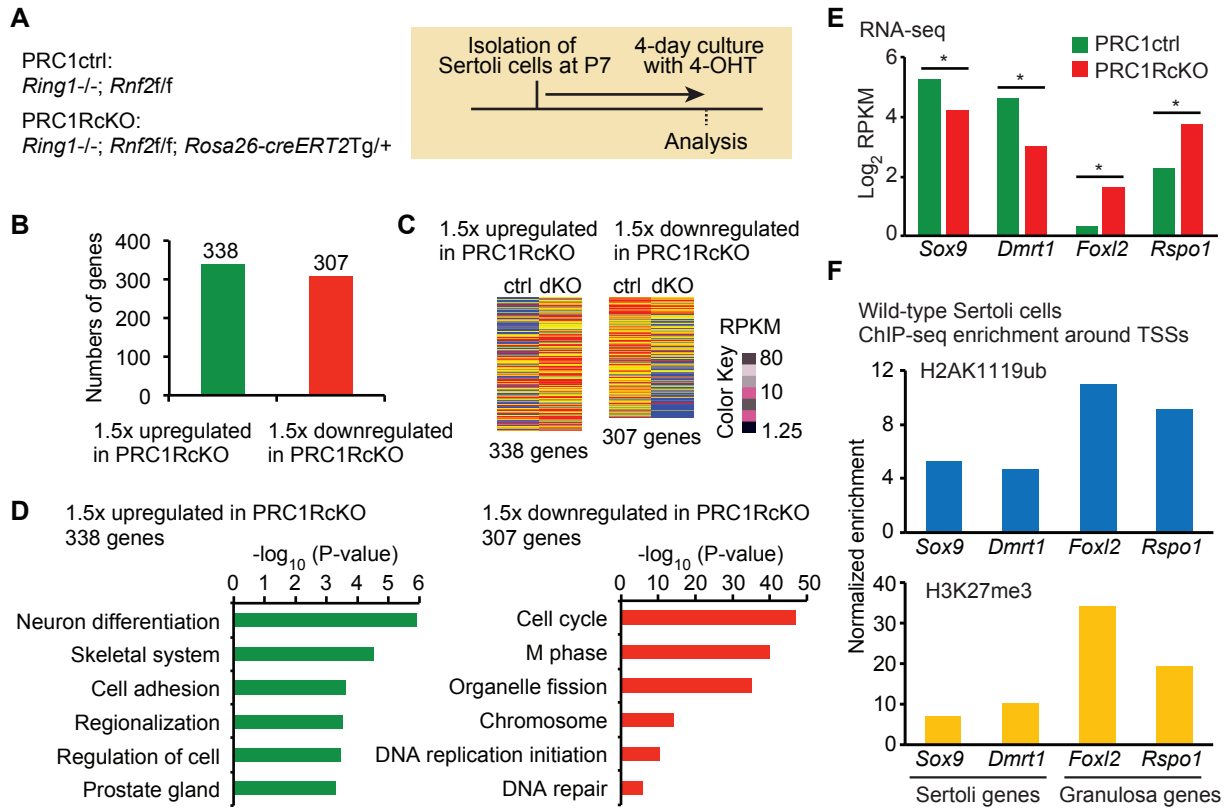

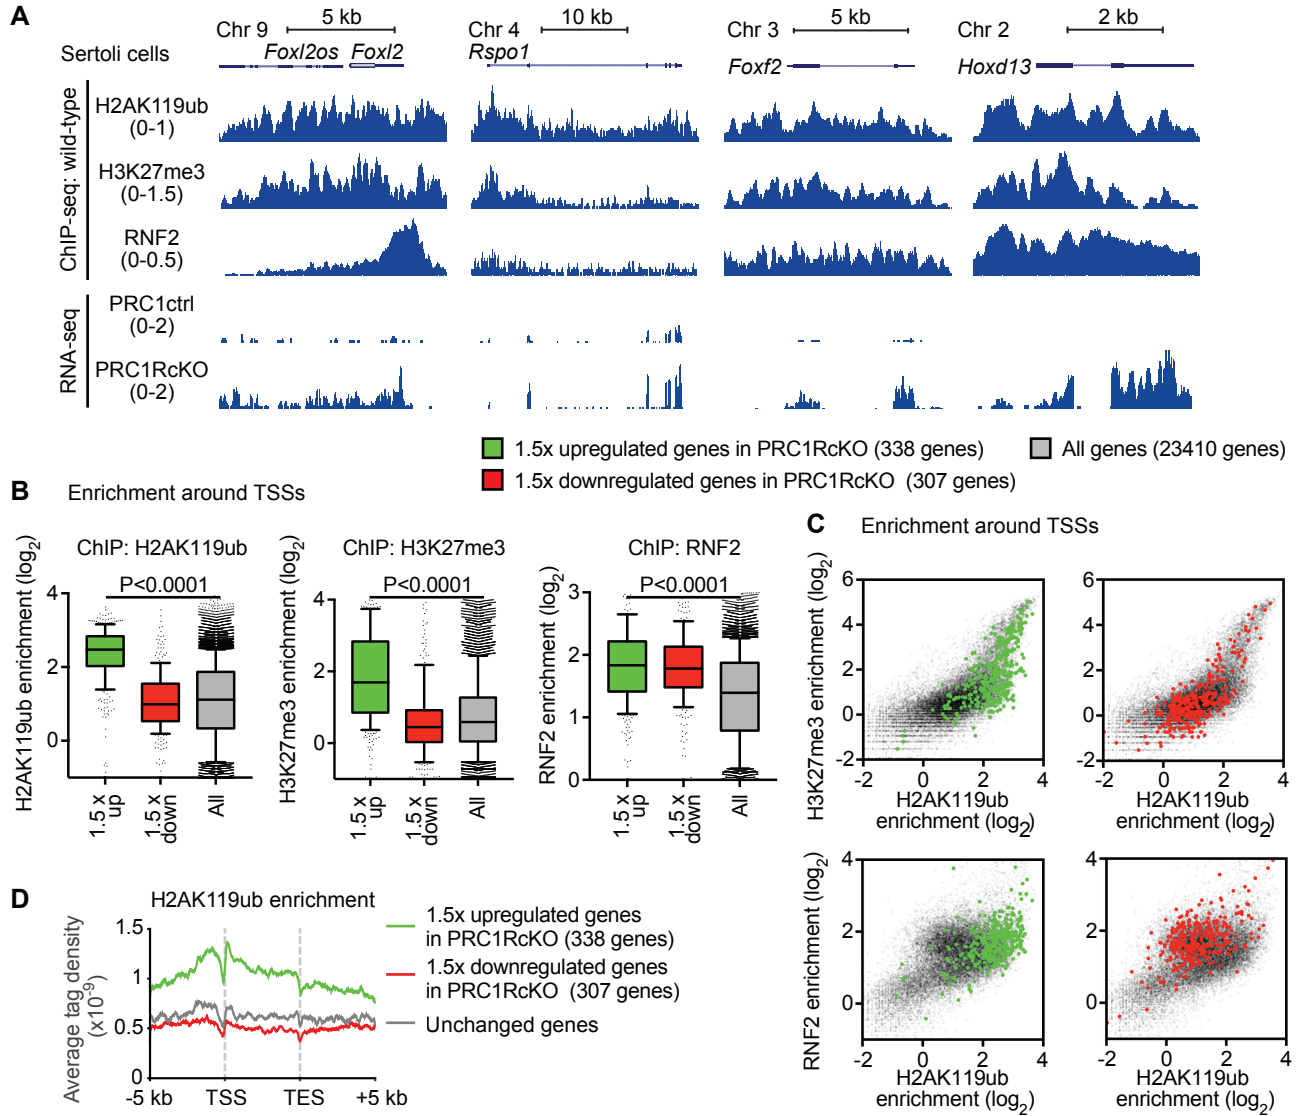

Maezawa\_Fig5

**A** Gene expression

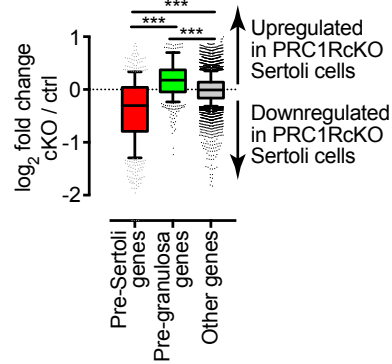

**B** Correlation of differential gene expression: E13.5 supporting cells vs postnatal Sertoli cells

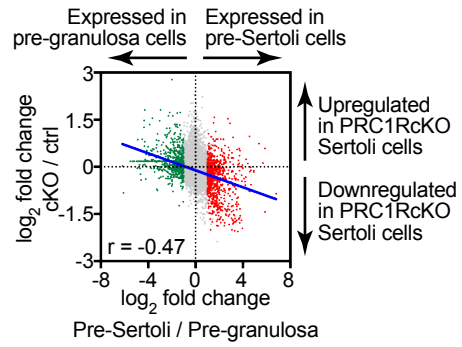

**C** H2AK119ub around TSS

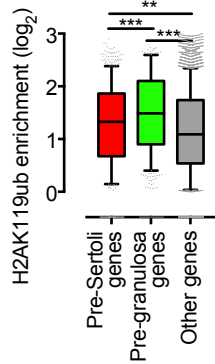

**D** Repression of pre-granulosa genes by H2AK119ub in Sertoli cells

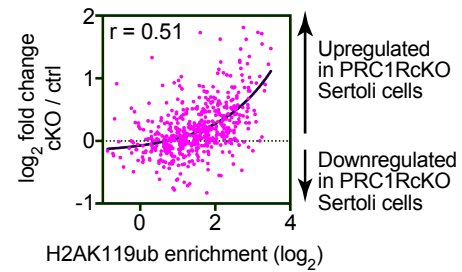

**A** RNA-seq

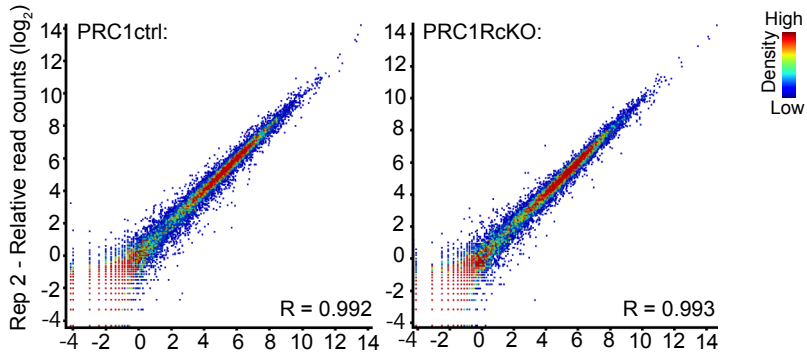

**B** ChIP-seq

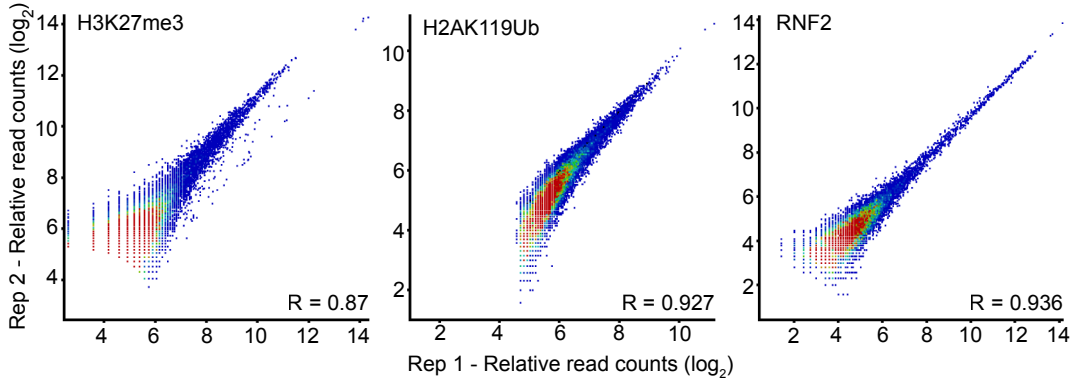

Maezawa\_Fig. S2

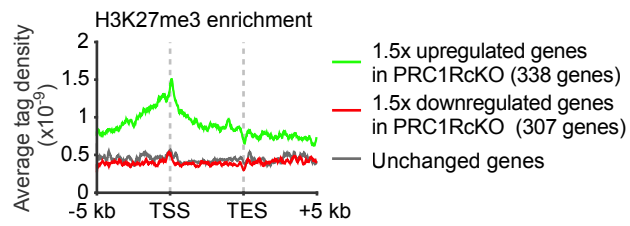

### Maezawa\_Fig. S3

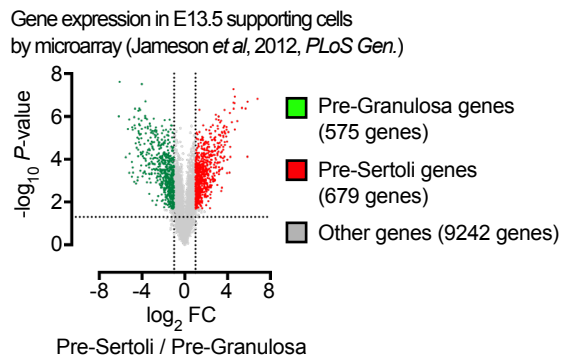

Maezawa\_Fig. S4

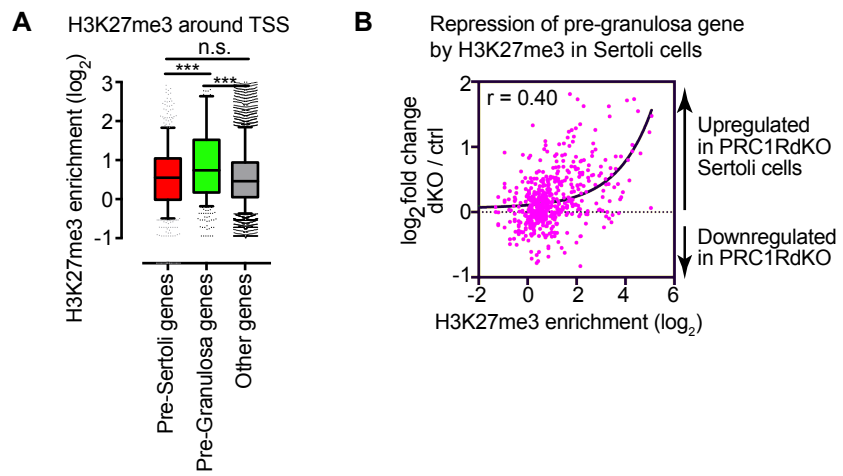

Source: https://www.biorxiv.org/content/biorxiv/early/2021/01/20/2021.01.19.427322.full.pdf
